# Supplementary material for: Occurrence of Selected Known or Suspected Endocrine-Disrupting Pesticides in Portuguese Surface Waters Using SPME-GC-IT/MS
Source: MDPI journal article supplement (doi:10.3390/separations8060081), 2021-06-07
Supplement: s1 [file s1]

## Article

# Occurrence of Selected Known or Suspected Endocrine-Disrupting Pesticides in Portuguese Surface Waters Using SPME-GC-IT/MS

José Vera <sup>1</sup>, Virgínia Cruz Fernandes <sup>1,\*</sup>, Luísa Correia-Sá <sup>1</sup>, Catarina Mansilha <sup>2,3</sup>, Cristina Delerue-Matos <sup>1</sup> and Valentina F. Domingues <sup>1</sup>

<sup>1</sup> REQUIMTE/LAQV, Instituto Superior de Engenharia do Porto, Instituto Politécnico do Porto, Rua Dr. António Bernardino de Almeida, 431, 4200-072 Porto, Portugal; jlquifi.2@gmail.com (J.V.); mariacs31@gmail.com (L.C.-S.); cmm@isep.ipp.pt (C.D.-M.); vfd@isep.ipp.pt (V.F.D.)

<sup>2</sup> REQUIMTE/LAQV, University of Porto, Porto, Praça Gomes Teixeira, Apartado 55142, 4051-401 Porto, Portugal; catarina.mansilha@insa.min-saude.pt

<sup>3</sup> Instituto Nacional de Saúde Doutor Ricardo Jorge, R. Alexandre Herculano 321, 4000-055 Porto, Portugal

\* Correspondence: vircru@gmail.com or virginiaacruz@graq.isep.ipp.pt; Tel.: +35-12-2834-0500

**Table S1.** List of endocrine disruptor compounds and their chemistry groups, company supplier, chemical structure, chemical formula, and molar mass.

| Pesticide    | Group            | Company supplier        | Purity (%) | Chemical structure                                                                    | Molar mass (g/mol) |
|--------------|------------------|-------------------------|------------|---------------------------------------------------------------------------------------|--------------------|
| Aldrin       | organo-chloride  | Pestanal Fluka          | 95.8       | 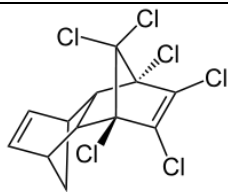 | 364.90             |
| Bifenthrin   | Pyre-throid      | ChemService             | 98.0       |   | 422.87             |
| Cypermethrin | Pyre-throid      | Pestanal Riedel-de Haën | 99.6       |   | 416.30             |
| Deltamethrin | Pyre-throid      | Pestanal Riedel-de Haën | 99.9       |   | 505.21             |
| Diazinon     | organo-phosphate | Pestanal Riedel-de Haën | 99.0       |   | 304.34             |

|                      |                 |                               |      |                                                                                       |         |
|----------------------|-----------------|-------------------------------|------|---------------------------------------------------------------------------------------|---------|
| <b>Dieldrin</b>      | organo-chloride | Pestanal<br>Fluka             | 97.9 | 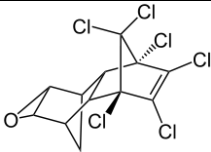   | 380.91  |
| <b>p,p'-DDD</b>      | organo-chloride | Supelco                       | 98.0 |     | 320.04  |
| <b>p,p'-DDE</b>      | organo-chloride | ChemService                   | 99.5 |    | 318.02  |
| <b>o,p'-DDT</b>      | organo-chloride | Supelco                       | 98.8 |    | 354.48  |
| <b>α-endosul-fan</b> | organo-chloride | Supelco                       | n.a. |  | 406.90  |
| <b>β-endosul-fan</b> | organo-chloride | Supelco                       | n.a. |                                                                                       |         |
| <b>Endrin</b>        | organo-chloride | Sigma Al-drich                | 99.1 |  | 380.907 |
| <b>Fen-valerate</b>  | Pyre-throid     | Pestanal<br>Riedel-de<br>Haën | 99.0 |   | 419.91  |
| <b>HCB</b>           | organo-chloride | Sigma Al-drich                | 99.0 |  | 284.80  |
| <b>α-HCH</b>         | organo-chloride | Pestanal<br>Riedel-de<br>Haën | 99.8 |  | 290.83  |
| <b>β-HCH</b>         | organo-chloride | Pestanal<br>Riedel-de<br>Haën | 99.8 |                                                                                       |         |

|                     |                 |                               |      |                                                                                     |        |
|---------------------|-----------------|-------------------------------|------|-------------------------------------------------------------------------------------|--------|
| <b>Lindane</b>      | organo-chloride | Pestanal<br>Riedel-de<br>Haën | 99.8 |                                                                                     |        |
| <b>Iprodione</b>    | Imidazole       | Pestanal<br>Riedel-de<br>Haën | 99.9 | 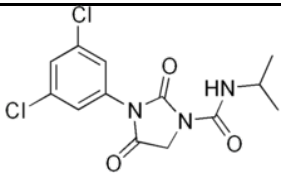 | 330.17 |
| <b>Methoxychlor</b> | organo-chloride | Supelco                       | 98.7 |  | 365.45 |
| <b>Vinclozolin</b>  | organo-chloride | Pestanal<br>Fluka             | 99.5 |  | 286.11 |

n.a- information not available.
